# Supplementary material for: Whole blood human transcriptome and virome analysis of ME/CFS patients experiencing post-exertional malaise following cardiopulmonary exercise testing
Source: PLoS One. 2019 Mar 21;14(3):e0212193. doi: 10.1371/journal.pone.0212193 (PMC6428308; doi:10.1371/journal.pone.0212193)
Supplement: S1 Appendix — Contains Figures A-F. (Fig A) Next-generation sequencing total read counts (grey bar), percentage of reads uniquely mapping to the human transcriptome (black diamond), and transcriptome coverage as the percentage of genes detected (red diamond). Two outlier samples with transcriptome coverage <40% were removed from subsequent human transcriptome analysis. (Fig B) Principal component analysis of the global gene expression shows no batch effect among the different sets of whole blood samples processed by RNA-seq analysis. (Fig C). Expression level dot plot and box plot of 6 differentially expressed genes (RPS12, SNORA27, RPL23A, HOXA9, NRON, LOC101192767) found when comparing CFS patients to controls at all time points. (Fig D). Expression level dot plot of LINC01158 found when comparing CFS patients to controls at day 7 only. (Fig E). Expression level dot plots of 6 differentially expressed genes found at day 1 (LOC105372441), day 3 (LOC100133050, PMS2P2), and day 7 (TMEM262, PRRP21, USP50) when comparing a subset of CFS patients with reduced peak V˙O2 at day 2 to CFS and controls with regular peak V˙O2. (Fig F). Expression level dot plots of 9 differentially expressed genes found at day 2 (MBIP, SNORA32), day 3 (LOC100133050, PMS2P2, RNASE8), and day 7 (TMEM262, LINC1068, CREB3L1, HNF4A-AS1) when comparing a subset of CFS patients with test-retest effect compared to CFS and controls without test-retest effect. (DOCX) [file pone.0212193.s001.docx]

**SUPPORTING INFORMATION**

**Whole blood human transcriptome and virome analysis of ME/CFS patients experiencing post-exertional malaise following cardiopulmonary exercise testing**

Jerome Bouquet1, Tony Li1, Jennifer L. Gardy2,3, Xiaoying Kang3, Staci Stevens4, Jared Stevens4, Mark VanNess4, Christopher Snell4, James Potts5, Ruth R. Miller3, Muhammad Morshed6,7, Mark McCabe2, Shoshana Parker8, Miguel Uyaguari6, Patrick Tang9, Ted Steiner10, Wee-Shian Chan10, Astrid-Marie De Souza11, Andre Mattman7,12, David M. Patrick2,3#, and Charles Y. Chiu1,13# for the Complex Chronic Disease Study Group

1Department of Laboratory Medicine, University of California San Francisco, CA, USA

2Communicable Disease Prevention and Control Services, British Columbia Centre for Disease Control (BCCDC), Vancouver, Canada

3School of Population and Public Health, University of British Columbia, Vancouver, Canada

4Workwell Foundation, Ripon, CA, USA

5Department of Pediatrics, Division of Cardiology, University of British Columbia, Vancouver, Canada

6British Columbia Centre for Disease Control Public Health Laboratory, Vancouver, Canada

7Department of Pathology and Laboratory Medicine, University of British Columbia, Vancouver, Canada

8Centre for Health Evaluation Outcome Sciences, Vancouver, Canada

9Department of Pathology, Sidra Medical and Research Center, Doha, Qatar

10Department of Medicine, Division of Infectious Diseases, University of British Columbia, Vancouver, Canada

11Division of Cardiology, British Columbia’s Children’s Hospital, Vancouver, Canada

12Adult Metabolic Disease Clinic, Vancouver General Hospital, Vancouver, Canada

13Department of Medicine, Division of Infectious Diseases, University of California, San Francisco, CA, USA

#co-corresponding authors
